# Supplementary material
Source: PubMed Central journal article supplement (PMC3060938)

# Supplemental table 1

| Parameter                                                                                             | ELISA (DELFI) assay performance |            |
|-------------------------------------------------------------------------------------------------------|---------------------------------|------------|
|                                                                                                       | PBMC                            | Plasma     |
| Between assay CV<br>SD                                                                                | 11.0 ± 3.3                      | 13.7 ± 8.0 |
| Within assay CV SD                                                                                    | 4.6 ± 0.5                       | 10.2 ± 3.3 |
| % recovery                                                                                            | 114 ± 13                        | 97 ± 8.0   |
| CV in quality control samples for all assays was 27.3% in HSP72 DELFIA and 12.4% in protein BCA assay |                                 |            |

Supplemental Table 2

| Dose 17-DMAG<br>(mg/m <sup>2</sup> ) | Number of<br>patients | HSP72<br>induced | Client(s)<br>Depleted | HSP90 inhibition<br>signature |
|--------------------------------------|-----------------------|------------------|-----------------------|-------------------------------|
| 2.5                                  | 3                     | ○○○              | ○○○                   | ○○○                           |
| 5                                    | 4                     | ●○○×             | ○○○×                  | ○○○×                          |
| 20                                   | 5*                    | ×○●○×            | ×●○○×                 | ×○○○×                         |
| 40                                   | 3                     | ●●●              | ○×○                   | ○○○○                          |
| 80                                   | 8                     | ●○○○●●●●         | ○○●●○○●○○             | ○○●○○●○○                      |
| 106                                  | 4                     | ●●●×             | ●●○×                  | ●●○×                          |

# Supplemental Figure 1

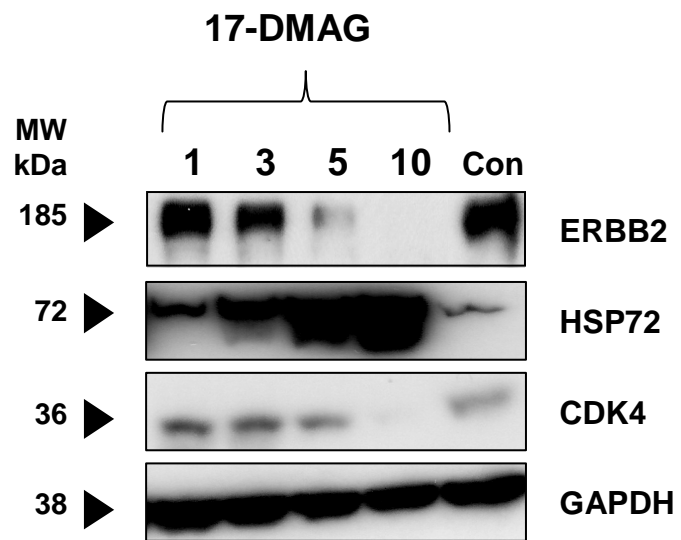

# Supplemental Figure 2

**A.**

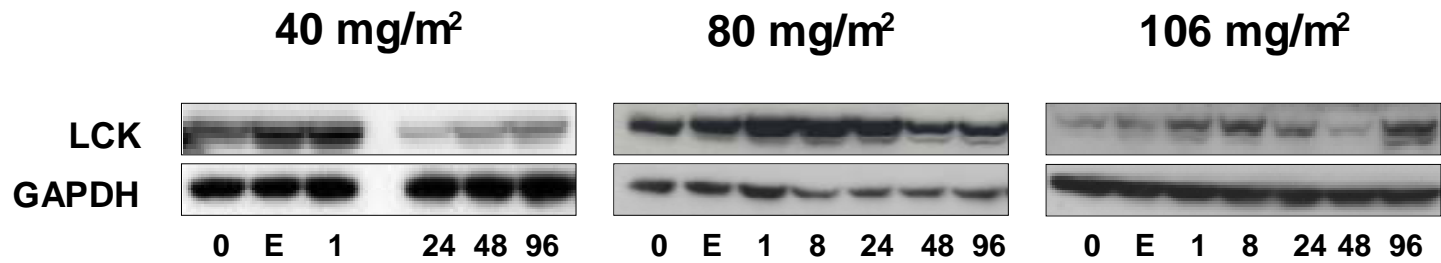

**B.**

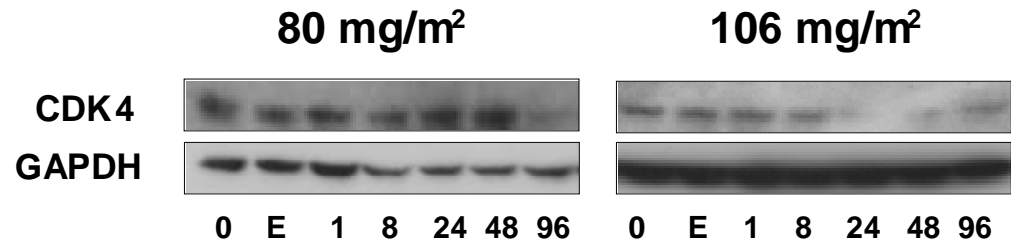

Supplement: NIHMS33491-supplement-Figs_Tabs.pdf [file NIHMS33491-supplement-Figs_Tabs.pdf]
